# Supplementary material for: California and federal school nutrition policies and obesity among children of Pacific Islander, American Indian/Alaska Native, and Filipino origins: Interrupted time series analysis
Source: PubMed Central journal article supplement (PMC8143391; doi:10.1371/journal.pmed.1003596), 2021-05-24
Supplement: pmed.1003596.s003.pdf [file pmed.1003596.s003.pdf]

| Before policies (2002-2004)                 | Girls in 5 <sup>th</sup> grade | Unadjusted logOR(95%CI) | p-value                  | Adjusted logOR (95%CI) | p-value |
|---------------------------------------------|--------------------------------|-------------------------|--------------------------|------------------------|---------|
|                                             |                                |                         |                          |                        |         |
| California policies only (2005-2012)        |                                |                         |                          |                        |         |
| White                                       | 0.027(0.019 to 0.034)          | <0.001                  | 0.03(0.02 to 0.041)      | <0.001                 |         |
| PI                                          | 0.151(0.11 to 0.191)           | <0.001                  | 0.149(0.108 to 0.189)    | <0.001                 |         |
| AIAN                                        | 0.07(0.031 to 0.109)           | <0.001                  | 0.081(0.042 to 0.12)     | <0.001                 |         |
| FI                                          | 0.01(-0.014 to 0.034)          | 0.423                   | 0.006(-0.02 to 0.031)    | 0.666                  |         |
| California and federal policies (2013-2016) |                                |                         |                          |                        |         |
| White                                       | -0.008(-0.012 to -0.005)       | <0.001                  | -0.001(-0.005 to 0.002)  | 0.474                  |         |
| PI                                          | 0.001(-0.013 to 0.016)         | 0.851                   | 0.01(-0.005 to 0.025)    | 0.178                  |         |
| AIAN                                        | 0.000(-0.014 to 0.013)         | 0.992                   | 0.005(-0.009 to 0.018)   | 0.479                  |         |
| FI                                          | -0.005(-0.013 to 0.003)        | 0.24                    | 0.003(-0.005 to 0.012)   | 0.417                  |         |
| Boys in 5 <sup>th</sup> grade               |                                |                         |                          |                        |         |
| White                                       | -0.026(-0.035 to -0.016)       | <0.001                  | -0.022(-0.035 to -0.01)  | 0.001                  |         |
| PI                                          | 0.015(-0.032 to 0.063)         | 0.528                   | -0.01(-0.066 to 0.046)   | 0.724                  |         |
| AIAN                                        | -0.05(-0.09 to -0.01)          | 0.014                   | -0.044(-0.093 to 0.004)  | 0.073                  |         |
| FI                                          | -0.029(-0.053 to -0.004)       | 0.024                   | -0.024(-0.054 to 0.007)  | 0.125                  |         |
| Before policies (2002-2004)                 |                                |                         |                          |                        |         |
| White                                       | 0.027(0.019 to 0.035)          | <0.001                  | 0.011(0.002 to 0.021)    | 0.024                  |         |
| PI                                          | 0.164(0.123 to 0.205)          | <0.001                  | 0.144(0.104 to 0.185)    | <0.001                 |         |
| AIAN                                        | 0.047(0.008 to 0.086)          | 0.019                   | 0.04(0.001 to 0.079)     | 0.046                  |         |
| FI                                          | 0.034(0.011 to 0.057)          | 0.003                   | 0.016(-0.008 to 0.039)   | 0.194                  |         |
| California policies only (2005-2012)        |                                |                         |                          |                        |         |
| White                                       | -0.015(-0.018 to -0.012)       | <0.001                  | -0.009(-0.013 to -0.005) | <0.001                 |         |
| PI                                          | -0.009(-0.023 to 0.006)        | 0.254                   | 0.002(-0.013 to 0.016)   | 0.808                  |         |
| AIAN                                        | 0.005(-0.009 to 0.018)         | 0.513                   | 0.006(-0.007 to 0.02)    | 0.353                  |         |
| FI                                          | -0.004(-0.011 to 0.003)        | 0.304                   | 0.002(-0.006 to 0.01)    | 0.629                  |         |
| California and federal policies (2013-2016) |                                |                         |                          |                        |         |
| White                                       | -0.02(-0.029 to -0.011)        | <0.001                  | -0.011(-0.023 to 0.002)  | 0.095                  |         |
| PI                                          | -0.008(-0.055 to 0.04)         | 0.756                   | -0.021(-0.077 to 0.035)  | 0.456                  |         |
| AIAN                                        | -0.033(-0.073 to 0.006)        | 0.098                   | -0.026(-0.074 to 0.023)  | 0.296                  |         |
| FI                                          | -0.042(-0.064 to -0.019)       | <0.001                  | -0.038(-0.066 to -0.01)  | 0.007                  |         |
