# Supplementary material for: California and federal school nutrition policies and obesity among children of Pacific Islander, American Indian/Alaska Native, and Filipino origins: Interrupted time series analysis
Source: PubMed Central journal article supplement (PMC8143391; doi:10.1371/journal.pmed.1003596), 2021-05-24
Supplement: pmed.1003596.s004.pdf [file pmed.1003596.s004.pdf]

| Before policies (2002-2004)                 | Girls in 7 <sup>th</sup> grade |         | Adjusted LogOR (95%CI)   | p-value |
|---------------------------------------------|--------------------------------|---------|--------------------------|---------|
|                                             | Unadjusted logOR(95%CI)        | p-value |                          |         |
| White                                       | 0.021(0.012 to 0.031)          | <0.001  | 0.027(0.016 to 0.038)    | <0.001  |
| PI                                          | 0.113(0.067 to 0.159)          | <0.001  | 0.115(0.072 to 0.158)    | <0.001  |
| AIAN                                        | 0.094(0.049 to 0.139)          | <0.001  | 0.095(0.053 to 0.137)    | <0.001  |
| FI                                          | 0.026(-0.003 to 0.055)         | 0.081   | 0.03(0.002 to 0.058)     | 0.035   |
| California policies only (2005-2012)        |                                |         |                          |         |
| White                                       | 0.000(-0.003 to 0.004)         | 0.891   | 0.008(0.004 to 0.012)    | <0.001  |
| PI                                          | 0.024(0.008 to 0.041)          | 0.004   | 0.031(0.016 to 0.046)    | <0.001  |
| AIAN                                        | 0.012(-0.003 to 0.028)         | 0.114   | 0.019(0.005 to 0.033)    | 0.010   |
| FI                                          | 0.000(-0.009 to 0.009)         | 0.984   | 0.01(0.001 to 0.019)     | 0.024   |
| California and federal policies (2013-2016) |                                |         |                          |         |
| White                                       | 0.004(-0.005 to 0.013)         | 0.390   | 0.007(-0.004 to 0.018)   | 0.197   |
| PI                                          | -0.017(-0.071 to 0.037)        | 0.538   | -0.025(-0.075 to 0.025)  | 0.336   |
| AIAN                                        | -0.043(-0.088 to 0.003)        | 0.065   | -0.034(-0.077 to 0.008)  | 0.113   |
| FI                                          | 0.006(-0.021 to 0.033)         | 0.665   | 0.009(-0.016 to 0.035)   | 0.476   |
|                                             | Boys in 7 <sup>th</sup> grade  |         |                          |         |
|                                             | Unadjusted logOR(95%CI)        | p-value | Adjusted LogOR (95%CI)   | p-value |
| Before policies (2002-2004)                 |                                |         |                          |         |
| White                                       | 0.015(0.006 to 0.023)          | 0.001   | 0.011(0.001 to 0.021)    | 0.035   |
| PI                                          | 0.109(0.063 to 0.155)          | <0.001  | 0.071(0.028 to 0.113)    | 0.001   |
| AIAN                                        | 0.068(0.022 to 0.114)          | 0.004   | 0.064(0.022 to 0.106)    | 0.003   |
| FI                                          | 0.004(-0.022 to 0.03)          | 0.770   | -0.006(-0.032 to 0.019)  | 0.617   |
| California policies only (2005-2012)        |                                |         |                          |         |
| White                                       | -0.011(-0.014 to -0.008)       | <0.001  | -0.005(-0.009 to -0.001) | 0.025   |
| PI                                          | 0.01(-0.006 to 0.027)          | 0.222   | 0.021(0.006 to 0.037)    | 0.005   |
| AIAN                                        | 0.004(-0.012 to 0.02)          | 0.609   | 0.007(-0.007 to 0.021)   | 0.337   |
| FI                                          | -0.009(-0.018 to -0.001)       | 0.025   | 0.000(-0.008 to 0.008)   | 0.971   |
| California and federal policies (2013-2016) |                                |         |                          |         |
| White                                       | 0.007(-0.002 to 0.016)         | 0.109   | -0.001(-0.011 to 0.01)   | 0.923   |
| PI                                          | -0.024(-0.078 to 0.03)         | 0.388   | -0.034(-0.083 to 0.015)  | 0.174   |
| AIAN                                        | -0.01(-0.057 to 0.036)         | 0.656   | -0.012(-0.055 to 0.03)   | 0.572   |
| FI                                          | 0.004(-0.021 to 0.028)         | 0.781   | -0.008(-0.032 to 0.015)  | 0.488   |
