# Supplementary material for: California and federal school nutrition policies and obesity among children of Pacific Islander, American Indian/Alaska Native, and Filipino origins: Interrupted time series analysis
Source: PubMed Central journal article supplement (PMC8143391; doi:10.1371/journal.pmed.1003596), 2021-05-24
Supplement: pmed.1003596.s005.pdf [file pmed.1003596.s005.pdf]

|                         |         | Girls in 5 <sup>th</sup> grade |         |                          |         |
|-------------------------|---------|--------------------------------|---------|--------------------------|---------|
| Comparison              | between | Unadjusted logOR(95%CI)        | p-value | Adjusted logOR (95%CI)   | p-value |
| 2002-2004 and 2005-2012 |         |                                |         |                          |         |
| White                   |         | -0.035(-0.044 to -0.026)       | <0.001  | -0.032(-0.044 to -0.019) | <0.001  |
| PI                      |         | -0.149(-0.199 to -0.099)       | <0.001  | -0.139(-0.189 to -0.088) | <0.001  |
| AIAN                    |         | -0.07(-0.118 to -0.023)        | 0.004   | -0.076(-0.124 to -0.028) | 0.002   |
| FI                      |         |                                | 0.320   | -0.002(-0.033 to 0.028)  | 0.888   |
| Comparison              | between | -0.015(-0.043 to 0.014)        |         |                          |         |
| 2005-2012 and 2013-2016 |         |                                |         |                          |         |
| White                   |         | -0.017(-0.028 to -0.006)       | 0.002   | -0.022(-0.035 to -0.01)  | 0.001   |
| PI                      |         | 0.014(-0.043 to 0.071)         | 0.630   | -0.01(-0.066 to 0.046)   | 0.724   |
| AIAN                    |         | -0.05(-0.099 to -0.001)        | 0.046   | -0.044(-0.093 to 0.004)  | 0.073   |
| FI                      |         | -0.024(-0.053 to 0.006)        | 0.114   | -0.024(-0.054 to 0.007)  | 0.125   |
| Comparison              | between |                                |         |                          |         |
| 2002-2004 and 2013-2016 |         |                                |         |                          |         |
| White                   |         | -0.052(-0.064 to -0.04)        | <0.001  | -0.054(-0.068 to -0.04)  | <0.001  |
| PI                      |         | -0.135(-0.192 to -0.078)       | <0.001  | -0.149(-0.206 to -0.092) | <0.001  |
| AIAN                    |         | -0.12(-0.171 to -0.07)         | <0.001  | -0.12(-0.171 to -0.07)   | <0.001  |
| FI                      |         | -0.038(-0.071 to -0.006)       | 0.019   | -0.026(-0.059 to 0.007)  | 0.123   |
|                         |         | Boys in 5 <sup>th</sup> grade  |         |                          |         |
| Comparison              | between | Unadjusted logOR(95%CI)        | p-value | Adjusted logOR (95%CI)   | p-value |
| 2002-2004 and 2005-2012 |         |                                |         |                          |         |
| White                   |         | -0.042(-0.052 to -0.033)       | <0.001  | -0.021(-0.033 to -0.009) | 0.001   |
| PI                      |         | -0.173(-0.223 to -0.122)       | <0.001  | -0.142(-0.193 to -0.092) | <0.001  |
| AIAN                    |         | -0.042(-0.09 to 0.006)         | 0.085   | -0.033(-0.081 to 0.015)  | 0.173   |
| FI                      |         | -0.038(-0.065 to -0.011)       | 0.006   | -0.014(-0.042 to 0.014)  | 0.341   |
| Comparison              | between | -0.005(-0.016 to 0.005)        |         |                          |         |
| 2005-2012 and 2013-2016 |         |                                |         |                          |         |
| White                   |         | 0.001(-0.056 to 0.058)         | 0.332   | -0.011(-0.023 to 0.002)  | 0.095   |
| PI                      |         | -0.038(-0.086 to 0.011)        | 0.126   | -0.026(-0.074 to 0.023)  | 0.456   |
| AIAN                    |         |                                | 0.006   | -0.038(-0.066 to -0.01)  | 0.296   |
| FI                      |         |                                |         |                          | 0.007   |
| Comparison              | between | -0.047(-0.058 to -0.037)       | <0.001  | -0.032(-0.044 to -0.019) | <0.001  |
| 2002-2004 and 2013-2016 |         |                                |         |                          |         |
| White                   |         | -0.172(-0.228 to -0.115)       | <0.001  | -0.164(-0.22 to -0.107)  | <0.001  |
| PI                      |         | -0.08(-0.13 to -0.03)          | 0.002   | -0.059(-0.109 to -0.009) | 0.021   |
| AIAN                    |         |                                | <0.001  | -0.052(-0.081 to -0.022) | 0.001   |
| FI                      |         |                                |         |                          |         |
