# Supplementary material for: California and federal school nutrition policies and obesity among children of Pacific Islander, American Indian/Alaska Native, and Filipino origins: Interrupted time series analysis
Source: PubMed Central journal article supplement (PMC8143391; doi:10.1371/journal.pmed.1003596), 2021-05-24
Supplement: pmed.1003596.s006.pdf [file pmed.1003596.s006.pdf]

|                         |         | Girls in 7 <sup>th</sup> grade |         |                          |         |
|-------------------------|---------|--------------------------------|---------|--------------------------|---------|
| Comparison              | between | Unadjusted logOR(95%CI)        | p-value | Adjusted logOR (95%CI)   | p-value |
| 2002-2004 and 2005-2012 |         |                                |         |                          |         |
| White                   |         | -0.021(-0.033 to -0.01)        | <0.001  | -0.019(-0.032 to -0.006) | 0.005   |
| PI                      |         | -0.089(-0.146 to -0.031)       | 0.002   | -0.084(-0.137 to -0.031) | 0.002   |
| AIAN                    |         | -0.082(-0.137 to -0.026)       | 0.004   | -0.076(-0.127 to -0.025) | 0.003   |
| FI                      |         | -0.026(-0.061 to 0.009)        | 0.14    | -0.02(-0.053 to 0.013)   | 0.237   |
| Comparison              | between |                                |         |                          |         |
| 2005-2012 and 2013-2016 |         |                                |         |                          |         |
| White                   |         | 0.004(-0.007 to 0.015)         | 0.502   | -0.001(-0.014 to 0.012)  | 0.904   |
| PI                      |         | -0.041(-0.106 to 0.023)        | 0.21    | -0.056(-0.115 to 0.004)  | 0.067   |
| AIAN                    |         | -0.055(-0.111 to 0)            | 0.052   | -0.053(-0.105 to -0.001) | 0.044   |
| FI                      |         | 0.006(-0.027 to 0.039)         | 0.717   | -0.001(-0.032 to 0.03)   | 0.963   |
| Comparison              | between |                                |         |                          |         |
| 2002-2004 and 2013-2016 |         |                                |         |                          |         |
| White                   |         | -0.017(-0.029 to -0.005)       | 0.005   | -0.02(-0.035 to -0.005)  | 0.01    |
| PI                      |         | -0.13(-0.195 to -0.065)        | <0.001  | -0.14(-0.2 to -0.079)    | <0.001  |
| AIAN                    |         | -0.137(-0.195 to -0.079)       | <0.001  | -0.129(-0.183 to -0.075) | <0.001  |
| FI                      |         | -0.02(-0.056 to 0.016)         | 0.28    | -0.021(-0.056 to 0.015)  | 0.254   |
|                         |         | Boys in 7 <sup>th</sup> grade  |         |                          |         |
| Comparison              | between |                                |         |                          |         |
| 2002-2004 and 2005-2012 |         |                                |         |                          |         |
| White                   |         | -0.025(-0.036 to -0.015)       | <0.001  | -0.016(-0.028 to -0.003) | 0.013   |
| PI                      |         | -0.099(-0.156 to -0.042)       | 0.001   | -0.049(-0.102 to 0.003)  | 0.065   |
| AIAN                    |         | -0.064(-0.12 to -0.007)        | 0.027   | -0.057(-0.109 to -0.006) | 0.029   |
| FI                      |         | -0.013(-0.045 to 0.018)        | 0.407   | 0.007(-0.024 to 0.037)   | 0.667   |
| Comparison              | between |                                |         |                          |         |
| 2005-2012 and 2013-2016 |         |                                |         |                          |         |
| White                   |         | 0.018(0.007 to 0.029)          | 0.001   | 0.004(-0.009 to 0.017)   | 0.528   |
| PI                      |         | -0.034(-0.099 to 0.03)         | 0.3     | -0.055(-0.113 to 0.003)  | 0.063   |
| AIAN                    |         | -0.015(-0.071 to 0.042)        | 0.614   | -0.019(-0.071 to 0.033)  | 0.467   |
| FI                      |         | 0.013(-0.017 to 0.043)         | 0.397   | -0.009(-0.037 to 0.02)   | 0.56    |
| Comparison              | between |                                |         |                          |         |
| 2002-2004 and 2013-2016 |         |                                |         |                          |         |
| White                   |         | -0.007(-0.019 to 0.004)        | 0.203   | -0.012(-0.026 to 0.002)  | 0.1     |
| PI                      |         | -0.133(-0.198 to -0.068)       | <0.001  | -0.105(-0.164 to -0.046) | 0.001   |
| AIAN                    |         | -0.078(-0.137 to -0.019)       | 0.009   | -0.077(-0.131 to -0.022) | 0.006   |
| FI                      |         | 0.000(-0.033 to 0.033)         | 0.98    | -0.002(-0.034 to 0.03)   | 0.907   |
